1 **Microglia do not restrict SARS-CoV-2 replication following**  
2 **infection of the central nervous system of K18-hACE2**  
3 **transgenic mice**

4  
5 **Running Title: SARS-CoV-2 infection of the CNS**

6  
7 Gema M. Olivarria<sup>1\*</sup>, Yuting Cheng<sup>2\*</sup>, Susana Furman<sup>1\*</sup>, Collin Pachow<sup>2</sup>, Lindsay A. Hohsfield<sup>1</sup>,  
8 Charlene Smith-Geater<sup>3</sup>, Ricardo Miramontes<sup>4</sup>, Jie Wu<sup>5</sup>, Mara S. Burns<sup>1</sup>, Kate I. Tsourmas<sup>1</sup>,  
9 Jennifer Stocksdale<sup>1</sup>, Cynthia Manlapaz<sup>1</sup>, William H. Yong<sup>6</sup>, John Teijaro<sup>7</sup>, Robert Edwards<sup>6</sup>,  
10 Kim N. Green<sup>1</sup>, Leslie M. Thompson<sup>1,3,5,6</sup>, and Thomas E. Lane<sup>1,2,8#</sup>

11  
12 <sup>1</sup>Department of Neurobiology & Behavior, <sup>2</sup>Department of Molecular Biology & Biochemistry,  
13 School of Biological Sciences, University of California, Irvine 92697

14  
15 <sup>3</sup>Department of Psychiatry and Human Behavior, University of California, Irvine School of  
16 Medicine, Irvine 92697

17  
18 <sup>4</sup>Institute for Memory Impairments and Neurological Disorders, School of Biological Sciences,  
19 University of California, Irvine 92697

20  
21 <sup>5</sup>Department of Biological Chemistry, University of California, Irvine School of Medicine, Irvine  
22 92697

23  
24 <sup>6</sup>Department of Pathology & Laboratory Medicine, University of California, Irvine School of  
25 Medicine, Irvine 92697

26  
27 <sup>7</sup>Department of Immunology & Microbiology, The Scripps Research Institute, La Jolla CA  
28 92037

29  
30 <sup>8</sup>Center for Virus Research, University of California, Irvine 92697

31  
32 \*These authors contributed equally to this work

33  
34 #Address Correspondence

35 Thomas E. Lane, Ph.D.

36 Department of Neurobiology & Behavior

37 School of Biological Sciences

38 University of California, Irvine

39 (949) 824-1360

40 Email: [tlane@uci.edu](mailto:tlane@uci.edu)

41

42

43

44

45 **Abstract**

46 Unlike SARS-CoV-1 and MERS-CoV, infection with SARS-CoV-2, the viral pathogen  
47 responsible for COVID-19, is often associated with neurologic symptoms that range from mild to  
48 severe, yet increasing evidence argues the virus does not exhibit extensive neuroinvasive  
49 properties. We demonstrate SARS-CoV-2 can infect and replicate in human iPSC-derived  
50 neurons and that infection shows limited anti-viral and inflammatory responses but increased  
51 activation of EIF2 signaling following infection as determined by RNA sequencing. Intranasal  
52 infection of K18 human ACE2 transgenic mice (K18-hACE2) with SARS-CoV-2 resulted in  
53 lung pathology associated with viral replication and immune cell infiltration. In addition, ~50%  
54 of infected mice exhibited CNS infection characterized by wide-spread viral replication in  
55 neurons accompanied by increased expression of chemokine (*Cxcl9*, *Cxcl10*, *Ccl2*, *Ccl5* and  
56 *Ccl19*) and cytokine (*Ifn-λ* and *Tnf-α*) transcripts associated with microgliosis and a  
57 neuroinflammatory response consisting primarily of monocytes/macrophages. Microglia  
58 depletion via administration of colony-stimulating factor 1 receptor inhibitor, PLX5622, in  
59 SARS-CoV-2 infected mice did not affect survival or viral replication but did result in dampened  
60 expression of proinflammatory cytokine/chemokine transcripts and a reduction in  
61 monocyte/macrophage infiltration. These results argue that microglia are dispensable in terms of  
62 controlling SARS-CoV-2 replication in in the K18-hACE2 model but do contribute to an  
63 inflammatory response through expression of pro-inflammatory genes. Collectively, these  
64 findings contribute to previous work demonstrating the ability of SARS-CoV-2 to infect neurons  
65 as well as emphasizing the potential use of the K18-hACE2 model to study immunological and  
66 neuropathological aspects related to SARS-CoV-2-induced neurologic disease.

67

68

69 **Keywords:** SARS-CoV-2, microglia, central nervous system, neuropathology

70

71 **Importance**

72 Understanding the immunological mechanisms contributing to both host defense and disease  
73 following viral infection of the CNS is of critical importance given the increasing number of  
74 viruses that are capable of infecting and replicating within the nervous system. With this in mind,  
75 the present study was undertaken to evaluate the role of microglia in aiding in host defense  
76 following experimental infection of the central nervous system (CNS) of K18-hACE2 with  
77 SARS-CoV-2, the causative agent of COVID-19. Neurologic symptoms that range in severity are  
78 common in COVID-19 patients and understanding immune responses that contribute to  
79 restricting neurologic disease can provide important insight into better understanding  
80 consequences associated with SARS-CoV-2 infection of the CNS.

81

82

## 83 **Introduction**

84           The clinical spectrum of COVID-19 is complex, and numerous risk factors and  
85 comorbidities are considered important in affecting disease severity including age, obesity,  
86 chronic respiratory disease, and cardiovascular disease [1]. In addition, neurological symptoms  
87 are common in COVID-19 patients, suggesting the virus can potentially infect and replicate in  
88 the central nervous system (CNS). Indeed, encephalitis and meningitis have been reported in  
89 COVID-19 patients, and viral RNA and protein have been detected within the CSF of infected  
90 patients [2-4]. Additionally, human brain organoids are susceptible to SARS-CoV-2 infection [2,  
91 5], yet demonstration of extensive CNS penetrance by SARS-CoV-2 has remained elusive. It is  
92 imperative to develop pre-clinical animal models of COVID-19 that capture consistent and  
93 reproducible clinical and histologic readouts of many disease-associated symptoms following  
94 experimental infection with clinical isolates of SARS-CoV-2 [6]. Importantly, these models  
95 should be able to reliably evaluate interventional therapies to limit viral replication and mute  
96 immune-mediated pathology, as well as evaluate effectiveness of novel vaccines, all while  
97 remaining cost-effective. To date, the most common animal models employed to evaluate  
98 COVID-19 pathogenesis include mice, non-human primates (rhesus macaques, cynomolgus  
99 macaques and African green monkeys), Syrian hamsters, ferrets, and cats [6].

100           Human ACE2 (hACE2) transgenic mouse models have provided important insights into  
101 the pathogenesis of COVID-19. Perlman and colleagues [7] developed the K18-hACE2 mice,  
102 initially used as a mouse model of SARS-CoV-1, which has been successfully employed as a  
103 model of COVID-19 [8]. Intranasal inoculation of SARS-CoV-2 in K18-hACE2 mice results in a  
104 dose-dependent increase in weight loss and mortality with the lung being the major site of viral  
105 infection, while lower amounts of virus are detected in the heart, liver, spleen, kidney, small

106 intestine, and colon [8]. Examination of lungs revealed distribution of viral antigen associated  
107 with alveolar damage, interstitial lesions, edema, and inflammation. Lung infection resulted in an  
108 increase in expression of interferons as well as inflammatory cytokines and chemokines  
109 associated with neutrophil, macrophage/monocyte, and T cell infiltration. Viral RNA was also  
110 detected within the sinonasal epithelium, and viral antigen was present in sustentacular cells  
111 associated with anosmia [8]. Examination of brains of SARS-CoV-2 infected hACE2 transgenic  
112 mice has indicated that infection of the CNS is not consistent, and in some cases, virus is rarely  
113 detected [8-12]. This may reflect the SARS-CoV-2 isolate being studied as well as the dose of  
114 virus being administered. However, in those animals in which virus penetrates the brain, there  
115 can be extensive spread of the virus throughout different anatomic regions accompanied by cell  
116 death [8], and these results are consistent with early studies examining SARS-CoV-1 infection of  
117 K18-hACE2 mice [7]. High-level of CNS infection in K18-hACE2 is accompanied by meningeal  
118 inflammation associated with immune cell infiltration into the brain parenchyma and microglia  
119 activation [11]. Enhanced CNS penetrance and replication of SARS-CoV-2 within the CNS of  
120 K18-hACE2 is associated with increased mortality; although the mechanisms by which this  
121 occurs remain unclear. The present study was undertaken to i) expand on earlier studies  
122 examining SARS-CoV-2 infection of human CNS resident cells, ii) evaluate the immune  
123 response that occurs in response to SARS-CoV-2 infection of the CNS of K18-hACE2 mice and  
124 iii) assess the contributions of microglia in host defense following CNS infection by SARS-CoV-  
125 2.

126  
127  
128  
129  
130  
131

132 **Results**

133

134 **SARS-CoV-2 infection of human neurons.** Previous studies have indicated neurons are  
135 susceptible to infection by SARS-CoV-2 (2); therefore, we infected human iPSC-derived  
136 neurons with SARS-CoV-2. Similar to earlier reports, SARS-CoV-2 was able to infect and  
137 replicate within neurons as determined by staining for nucleocapsid protein (**Figures 1A and B**).  
138 By 48h p.i., viral nucleocapsid protein had spread from the neuron cell body and extended down  
139 dendritic and axonal projections (**Figures 1C and D**). Notably, we did not detect syncytia  
140 formation in neuron cultures at any time following infection with SARS-CoV-2, suggesting that  
141 virus may not spread via fusion with neighboring cells. RNA sequencing analysis revealed that  
142 expression of both anti-viral and inflammatory responses in infected neurons was limited relative  
143 to the genes within the heatmap at both 24h and 48h post-infection (**Figure 1E**). We then  
144 evaluated pathways that may progressively change between 24h and 48h post-infection  
145 comparing the Transcripts per million (TPMs) as input for Ingenuity Pathway Analysis (IPA).  
146 **Figure 1F** shows the top 12 IPA canonical pathways that are overrepresented. eIF2 signaling is  
147 the predominant pathway induced upon SARS-CoV-2 infection of neurons, followed by  
148 pathways associated with oxidative phosphorylation, eIF4, MTOR signaling and mitochondrial  
149 dysfunction, the latter with no prediction of activity. Notably, the Coronavirus Pathogenesis  
150 Pathway is also overrepresented, however is inhibited in response to neuronal infection by  
151 SARS-CoV-2 over the time frame tested with the majority of the genes represented encoding  
152 ribosomal proteins (**Figure 1F**).

153

154 **SARS-CoV-2 infection of lungs of K18-hACE2 mice.** K18-hACE2 mice were intranasally  
155 infected with either  $1 \times 10^4$ ,  $5 \times 10^4$  or  $1 \times 10^5$  plaque-forming units (PFU) of SARS-CoV-2, and

156 weight loss and mortality were recorded. Consistent with other reports [8-12], we observed a  
157 general trend towards dose-dependent increase in weight loss and mortality out to day 7 post-  
158 infection (p.i.) (**Figure 2A**). qPCR indicated the presence of viral RNA in lungs of infected K18-  
159 hACE2 (**Figure 2B**). *In situ* hybridization of lungs of mice infected with  $5 \times 10^4$  PFU of virus at  
160 day 7 p.i. revealed localized areas of viral infection as determined by expression of spike RNA  
161 (**Figures 2C**). Hematoxylin and eosin staining of lungs demonstrated both alveolar and  
162 interstitial lesions, with alveolar hemorrhage and edema (**Figures 2D**), interstitial congestion  
163 (**Figure 2E**) and lymphocytic infiltrates (**Figure 2F**). qPCR analysis of proinflammatory  
164 cytokines and chemokines indicated increased expression of *Ifn- $\lambda$* , *Cxcl10*, *Cxcr2*, and *Ccl2* yet  
165 varied expression of *Il-10*, *TNF- $\alpha$* , *Ccl19*, and *Ccl5* and limited expression of transcripts for *Ifn-*  
166  *$\beta$*  (**Figure 2G**). Hematoxylin and eosin staining showed immune cell infiltrates in SARS-CoV-  
167 2-infected lungs containing inflammatory CD8+ T cells as determined by immunofluorescent  
168 staining (**Figures 3A-D**). In addition, germinal center-like structures were detected within the  
169 lungs of SARS-CoV-2-infected mice with enriched CD8+ T cell accumulation (**Figures 3E and**  
170 **F**). Collectively, our findings are consistent with previous studies employing SARS-CoV-2  
171 infection of K18-hACE2 mice in terms of development of interstitial pneumonia and immune  
172 cell infiltration associated with viral RNA present within the lungs [8-12].

173  
174 **Neuroinvasion by SARS-CoV-2.** Following intranasal infection of mice with  $5 \times 10^4$  PFU of  
175 SARS-CoV-2, virus was detected in the brain as determined by qPCR and RNAscope compared  
176 to sham-infected mice (**Figures 4A-C**). Using a Spike-specific probe, we observed wide-spread  
177 expansion of viral mRNA throughout the brain with many distinct anatomical regions infected as  
178 well as spared. By day 7 p.i., viral RNA was present within the cortex (CTX), striatum (STR),

179 pallidum (PAL), thalamus (TH), hypothalamus (HY), midbrain (MB), pons (P), and medulla  
180 (MD), whereas areas that were relatively spared included the olfactory bulb (OB), white matter  
181 (WM) tracts, hippocampus (HC) and cerebellum (CB) (**Figure 4B**); no viral RNA was detected  
182 in sham-infected K18-hACE2 mice (**Figure 4C**). Demyelinating lesions have been detected in  
183 post-mortem brains of COVID-19 patients [13], however we did not detect any evidence of  
184 demyelination within the brains of SARS-CoV-2-infected mice as determined by luxol-fast blue  
185 (LFB) staining (**Figures 4D and E**). The predominant cellular target for SARS-CoV-2 infection  
186 was neurons as determined by cellular morphology of cells positive for viral RNA (**Figures 5A**  
187 **and B**). In a small percentage of infected mice, we were able to detect viral RNA in the olfactory  
188 bulb with primary targets being mitral and glomerular neurons (**Figure 5C and D**). Prominent  
189 neuropathological changes detected included perivascular cuffing (**Figure 5E**), subventricular  
190 inflammation (**Figures 5F**) and leptomeningitis (**Figure 5G**), consistent with previous studies (2,  
191 3).

192         Analysis of CNS myeloid cells showed increased IBA1 soma size and  
193 shortened/thickened processes, indicative of microglial activation in SARS-CoV-2-infected mice  
194 compared to sham-infected mice (**Figure 6A and B**). In addition, immunofluorescent co-staining  
195 for Mac2/galectin-3+ cells, a marker recently identified in peripheral cell infiltrates, and IBA1  
196 (Hohsfield *et al. manuscript in revision*), revealed increased monocyte/macrophage infiltration  
197 within the brains of infected mice compared to sham-infected mice (**Figure 6A and B**). Mac2+  
198 cells enter the CNS parenchyma from different anatomic areas including the ventricles,  
199 leptomeninges and vasculature (**Figure 6C and D**) when compared to uninfected control mice  
200 (**Figure 6E**).

201

202 **Microglia ablation does not affect disease or control of viral replication in the CNS.**

203 Previous studies have implicated the importance of microglia in aiding in control of  
204 neuroadapted murine beta-coronaviruses by enhancing anti-viral T cell responses through  
205 augmenting antigen presentation (11-13). Notably, microglia are dependent on signaling through  
206 the colony stimulating factor 1 receptor (CSF1R) for their survival and can be effectively  
207 eliminated with CSF1R inhibitors that cross the blood brain barrier [14]. K18-hACE2 mice were  
208 fed pre-formulated chow containing either the CSF1R inhibitor PLX5622 (1,200 ppm) [15] or  
209 control chow 7 days prior to intranasal infection with  $5 \times 10^4$  PFUs of SARS-CoV-2, and  
210 remained on drug for the duration of the experiment [6]. No notable differences were detected in  
211 weight loss between experimental groups (**Figure 7A**). SARS-CoV-2-infected mice treated with  
212 either PLX5622 or control chow were sacrificed at day 7 p.i., and viral mRNA levels in lungs  
213 and brains were determined. As shown in **Figure 7B**, we detected no significant differences in  
214 the Spike mRNA transcripts in either the lung or the brain between experimental groups.  
215 Quantification of Iba1-positive cells revealed a >95% reduction ( $p < 0.01$ ) in microglia in  
216 PLX5622-treated mice compared to control mice. Overall, PLX5622-mediated ablation of  
217 microglia resulted in a dramatic reduction in expression of proinflammatory cytokine/chemokine  
218 genes within the brains of SARS-CoV-2 infected mice when compared to infected mice fed  
219 control chow (**Figure 7D**). By day 7 p.i., SARS-CoV-2 infection resulted in increased expression  
220 of proinflammatory cytokines and chemokines in mice treated with control chow. The highest  
221 transcript levels were for the T cell chemoattractants CXCL9 and CXCL10;  
222 monocyte/macrophage chemoattractants, CCL2 and CCL5; and TNF- $\alpha$  (**Figure 7D**). Transcripts  
223 encoding the neutrophil chemoattractant CXCL1, and B cell chemoattractant CCL19 were also  
224 increased, as well as IFN- $\lambda$  type 3 and IL-10 when compared to uninfected controls (**Figure 7D**).



225 Depletion of microglia resulted in a marked reduced expression of the majority  
226 chemokine/cytokines transcripts. While not significant, there was a marked reduction in  
227 Mac2/galactin3+ cells in PLX5622-treated mice when compared to control chow and this  
228 correlated with reduced expression of monocyte/macrophage chemoattractant chemokines CCL2  
229 and CCL5 (**Figure 7E**) that have previously been shown to attract these cells into the CNS of  
230 mice infected with a neurotropic mouse coronavirus [16-21].  
231

## 232 **Discussion**

233           In the face of the ongoing COVID-19 pandemic, it is imperative to develop pre-clinical  
234 animal models of COVID-19 that capture consistent and reproducible clinical and histologic  
235 readouts of many disease-associated symptoms following experimental infection with SARS-  
236 CoV-2 [1]. For both SARS-CoV-2 and SARS-CoV-1, the surface-bound viral spike glycoprotein  
237 uses the cellular surface receptor protein, ACE2, to bind and enter cells. However, mouse ACE2  
238 does not efficiently bind the spike glycoprotein of either SARS-CoV-1 or SARS-CoV-2,  
239 rendering wildtype mice not useful in the study of SARS or COVID-19 pathogenesis,  
240 respectively, due to an inefficient ability to infect and replicate in host cells. Human ACE2  
241 (hACE2) transgenic mouse models have provided important insights into the pathogenesis of  
242 COVID-19 in terms of evaluating the efficacy and duration of immune responses elicited in  
243 response to infection as well as testing vaccines, anti-viral drugs and monoclonal antibody  
244 therapies to restrict viral replication and limit disease severity [8].

245           Intranasal inoculation of K18-hACE2 mice with SARS-CoV-2 resulted in weight loss  
246 along with viral infection and replication within the lungs that was associated with a robust  
247 inflammatory response. These findings are consistent with other reports that demonstrated the  
248 presence of neutrophils, monocytes/macrophages and T cells within the lungs of SARS-CoV-2-  
249 infected K18-hACE2 mice [8, 11]. In response to infection, expression of proinflammatory  
250 cytokines/chemokines was increased and correlated with the presence of inflammatory cells. We  
251 detected inflammatory CD8<sup>+</sup> T cells in the lungs of infected mice and these cells are presumably  
252 responding to the T cell chemoattractant CXCL10. Our lab has previously shown that induction  
253 of CXCL10 expression following experimental infection of mice with a neuroadapted strain of  
254 murine coronavirus is critical in host defense and acts by attracting virus-specific T cells into the

255 CNS [22-24]. Similarly, inflammatory monocyte/macrophages are likely recruited in response to  
256 expression of CCL2 as this has been shown to attract these cells following murine coronavirus  
257 infection of mice [16-19]. The increased expression of transcripts encoding CXCR2 most likely  
258 reflects the presence of inflammatory neutrophils [25]. Therapeutic targeting of these  
259 chemokines may therefore alter immune cell trafficking into the lungs of infected mice and  
260 alleviate the severity of lung pathology. How blocking chemokine signaling would affect SARS-  
261 CoV-2-induced lung pathology in COVID-19 patients is currently under investigation.

262       Clinical reports of COVID-19 patients cite a dysregulated immune response characterized  
263 by elevated chemokine expression as key in the development of pathogenesis [26, 27]. Similar to  
264 our findings using the K18-hACE2 model, these reports have found upregulation of CCL2  
265 (MCP1), CXCL8 (IL-8), and CXCL10 (IP10) to correlate with severity of disease and have  
266 suggested evaluation of these as biomarkers for disease and as targets for therapeutic  
267 intervention [28-30]. Leronlimab, a CCR5-blocking antibody, is currently in phase 2 clinical  
268 trials in the U.S. for treatment of mild, moderate, and severe COVID-19 (NCT04343651,  
269 NCT04347239). In addition, limiting neutrophil infiltration into the lungs of COVID-19 patients  
270 may help prevent disease progression and outcome. With this in mind, the monoclonal antibody  
271 BMS-986253 that blocks CXCL8 as well as Reparixin, an oral inhibitor of CXCR1/2, are both  
272 currently undergoing clinical trials in the U.S. for reducing the severity of COVID-19-related  
273 pneumonia by reducing neutrophil accumulation within the lungs of infected patients  
274 (NCT04878055, NCT04347226). A clinical trial was recently completed using measurement of  
275 CXCL10 in a Clinical Decision Support Protocol in COVID-19 patients (NCT04389645) that  
276 positively correlated CXCL10 levels with mortality suggesting that targeting CXCL10 signaling  
277 may also be beneficial in managing disease severity [31].

278 Examination of brains of SARS-CoV-2-infected K18-hACE2 mice, as well as brains  
279 from other hACE2 transgenic mice, has revealed that virus is able to infect, replicate and spread  
280 within the parenchyma and this is considered important in contributing to mortality [2, 5, 8, 9].  
281 Virus can be detected in different anatomic regions of the brain and is accompanied by cell death  
282 [5] and these observations are consistent with early studies examining SARS-CoV-1 infection of  
283 K18-hACE2 mice [7]. Our results indicate that neurons are primary targets for SARS-CoV-2  
284 infection within the brains of K18-hACE2 mice which is consistent with other studies [10, 32,  
285 33]. Furthermore, human iPSC-derived neurons were susceptible to SARS-CoV-2 infection and  
286 virus was able to replicate in these cells. The detection of viral antigen within dendrites  
287 extending from the cell body suggests this may offer a unique mechanism of viral replication and  
288 spread in neurons and this is further emphasized by the absence of cell death and/or syncytia  
289 formation. RNA sequencing of infected neurons revealed that expression of most inflammatory  
290 and anti-viral response genes were reduced in SARS-CoV-2-infected neurons, consistent with a  
291 previously published study highlighting the muted immune response in neurons infected with  
292 SARS-CoV-2 as compared to Zika virus [2]. However, IPA analysis determined that despite the  
293 lack of induced immune and inflammatory response in infected neurons, there was a significant  
294 overrepresentation of pathways associated with eIF2, oxidative phosphorylation, regulation of  
295 eIF4 and mTOR signaling. eIF2, which mediates initiation of eukaryotic translation by binding  
296 Met-tRNA<sub>i</sub><sup>Met</sup> to the ribosomal subunit, can be activated via phosphorylation by various kinases,  
297 including protein kinase-RNA-dependent (PKR), PKR-like endoplasmic reticulum kinase  
298 (PERK), and heme regulated inhibitor (HRI) [34]. Upregulation of eIF2 phosphorylation by  
299 these can occur in response to various types of stressors including viral infection, ER stress, or  
300 oxidative stress, respectively [34]. Upregulation of eIF4, which mediates recruitment of

301 ribosomes to mRNA for translation, alongside overactivation of mTOR signaling, which  
302 modulates eIF4 activity, suggests infection of neurons with SARS-CoV-2 induces increased  
303 cellular activity and protein production even in the absence of inflammatory and anti-viral gene  
304 induction [35]. Whether this increase in protein production pathways corresponds to viral  
305 hijacking of cellular machinery for viral reproduction or if it corresponds to other induced  
306 mechanisms of neuronal stress/survival response remains to be determined.

307 Resident cells of the CNS are important in host defense following viral infection through  
308 either secretion of anti-viral cytokines like type I interferon (IFN-I) and pro-inflammatory  
309 cytokines/chemokines, and presentation of antigen to infiltration of antigen-sensitized T cells.  
310 We found the transcripts encoding the T cell chemoattractant chemokines including CXCL9 and  
311 CXCL10 were expressed along with monocyte/macrophage chemokines CCL2 and CCL5 and  
312 CXCL1 which attracts neutrophils. In addition, transcripts specific for the B cell chemoattractant  
313 CCL19 were also detected. The chemokine elicited in response to CNS infection of K18-hACE2  
314 by SARS-CoV-2 infection is remarkably similar to the chemokine response following CNS  
315 infection of mice with the neuroadapted strains of murine coronaviruses [36, 37]. This is  
316 interesting in that murine coronavirus are primarily tropic for glial cells e.g. astrocytes, microglia  
317 and oligodendrocytes with relative sparing of neurons while neurons appear to be exclusively  
318 targeted by SARS-CoV-2. These findings argue that expression of chemokines following  
319 coronavirus infection of the CNS may not be influenced by the cellular target of infection and  
320 this may reflect a localized response to expression of interferons (IFN) expressed in response to  
321 viral infection. With this in mind, we did detect IFN $\lambda$ 3 transcripts within the brains of SARS-  
322 CoV-2 infected mice yet IFN $\beta$ 1 transcripts was noticeably reduced. The inflammatory response  
323 consisted primarily of monocytes/macrophages as determined by immunofluorescent staining for

324 Mac2 and these cells are most likely migrating into the CNS in response to CCL2 and CCL5  
325 expression [18-21]. We did not detect a robust T cell response and this was surprising given the  
326 expression levels of CXCL9 and CXCL10 transcripts. Whether this simply reflected that T cells  
327 had yet to migrate into the brains of infected mice at the time of sacrifice or if efficient  
328 translation of these transcripts is compromised is not known at this time.

329         Microglia are now recognized to be important in host defense in response to viral  
330 infection of the CNS [38-42]. Targeted depletion of microglia via CSF1R inhibition leads to  
331 increased mortality in mice infected with West Nile Virus (WNV) and is associated with  
332 diminished activation of antigen presenting cells (APCs) and limited reactivation of virus-  
333 specific T cells that leads to reduced viral clearance [39, 41]. Similar findings have been reported  
334 for other neurotropic viruses including Japanese encephalitis virus (JEV) [41] and Theiler's  
335 murine encephalomyelitis virus (TMEV) [40, 42]. Moreover, microglia have also been shown to  
336 enhance host defense following CNS infection by the neurotropic JHM strain of mouse hepatitis  
337 virus (JHMV, a murine coronavirus) and this was related to inefficient T cell-mediated control of  
338 viral replication [38, 43]. Additionally, the absence of microglia also results in an increase in the  
339 severity of demyelination, accompanied by a decrease in remyelination [43, 44]. In response to  
340 SARS-CoV-2 CNS infection, we did detect microgliosis indicating these cells are responding to  
341 infection and may be involved in host defense. Ablation of microglia via PLX5622  
342 administration did not affect clinical disease nor viral burden within the brain indicating these  
343 cells are dispensable in terms of controlling SARS-CoV-2 replication within the brain in the  
344 K18-hACE2 model. There was a marked reduction in expression of proinflammatory  
345 cytokines/chemokines including monocyte/macrophage chemoattractants CCL2 and CCL5 and  
346 this corresponded with an overall reduction in numbers of these cells in the brains of PLX5622-

347 treated mice. These findings support the notion that microglia do contribute to the  
348 neuroinflammatory response, in part, through influencing expression of chemokines/cytokines in  
349 response to SARS-CoV-2 infection of the CNS of K18-hACE2 mice.

350         Very early in the COVID-19 pandemic, it became apparent that an abundant number of  
351 patients exhibited a variety of neurologic conditions that ranged in severity. Although numerous  
352 neurological symptoms have been associated with COVID-19, the most common neurologic  
353 symptoms include anosmia/dysgeusia, delirium, encephalopathy, and stroke [45-47]. The  
354 overwhelming evidence indicates that SARS-CoV-2 is not readily detected within the CNS by  
355 either PCR and/or immunohistochemical staining [2, 48] suggesting that neurologic  
356 complications associated with COVID-19 patients may occur through alternative mechanisms,  
357 including the potential development of autoreactive antibodies specific for neural antigens [49].  
358 COVID-19 patients have anti-SARS-CoV-2 IgG antibodies in the cerebral spinal fluid (CSF) that  
359 recognized target epitopes that different from serum antibodies. Moreover, a portion of COVID-  
360 19 patients exhibited CSF antibodies that targeted self-antigens, arguing for the possibility that  
361 neurologic disease may be associated with CNS autoimmunity [49]. Nonetheless, neurons and  
362 cells of the vasculature have been shown to be targets of infection [50-54]. Despite increasing  
363 evidence indicating extensive SARS-CoV-2 infection of the CNS does not occur, autopsy  
364 findings indicate the presence of microglia nodules, astrocyte activation and CD8+ T cell  
365 infiltration in the brain, providing evidence for immune responses occurring within the CNS of  
366 infected patients [3, 55, 56]. Related to this, a recent study indicated microglia nodules  
367 interacting with inflammatory CD8+ T cells within distinct anatomical regions of the brains of  
368 COVID-19 patients and this correlated with alerted systemic inflammation [57]. It is  
369 incontrovertible that transgenic hACE2 models, particularly the K18-hACE2 model, have

370 provided a better understanding of the pathogenesis of COVID-19 yet the one notable and  
371 consistent drawback of many of these models is the ability of virus to infect, efficiently replicate,  
372 and spread within the parenchyma, which contributes to increased mortality. These findings  
373 emphasize the importance of working with animal models in which SARS-CoV-2 entry into the  
374 CNS is more consistent with what has been observed in COVID-19 patients.

375

376



377 **Materials and Methods**

378 **Mice and viral infection:** All experiments were performed in accordance with animal protocols  
379 approved by the University of California, Irvine Institutional Animal Care and Use Committee.  
380 8-16 week-old heterozygous K18-hACE2 C57BL/6 [strain: B6.Cg-Tg(K18-ACE2)2Prlmn/J]  
381 mice were obtained from Jackson Laboratory. Animals were housed by sex in single use  
382 disposable plastic cages and provided ad-libitum water. SARS-CoV-2 isolate USA-WA1/2020  
383 was obtained from BEI. Mice were inoculated with between  $10^4$ - $10^5$  PFU of SARS-CoV-2 in  
384 10 $\mu$ L of DMEM or sham inoculated. Inoculations were performed under deep anesthesia through  
385 an intraperitoneal injection of a mixture of ketamine and xylazine. Infected and uninfected mice  
386 were examined and weighed daily. Animals were euthanized early if they reached pre-  
387 determined euthanasia criteria.

388  
389 **iPSC-neuronal differentiation:** iPSC line iCS83iCTR33n1 was previously derived,  
390 characterized [58] and maintained as described at 37°C, 5% CO<sub>2</sub> on hESC Matrigel<sup>®</sup> (Fisher  
391 Scientific cat#08774552) with daily feeding of mTeSR1<sup>™</sup> (Stem Cell Technologies cat#85850)  
392 [59]. Neuronal differentiation was performed using the protocol as described [59] with a  
393 modification that the cells were frozen at the neural progenitor stage at day 8 in CryoStor CS10  
394 (Stem Cell Technologies #07931). Cells were thawed into LIA medium (ADF supplemented  
395 with 2mM Glutamax, 2% B27 without vitamin A, 0.2 $\mu$ M LDN 193189 and 1.5 $\mu$ M IWR1  
396 20ng/mL Activin A (Peprotech #120-14E)) containing 10 $\mu$ M Y-27632 dihydrochloride for the  
397 first day post-thaw for further neural differentiation and subsequent daily feeds with LIA without  
398 Y-27632 dihydrochloride. Differentiated neurons were plated at 1x10<sup>6</sup> cells per well in 6-well

399 plate format or at  $8 \times 10^4$  cells per chamberslide well for imaging. Cells were infected with either  
400 pseudovirus or SARS-CoV-2 at d46-50 after start of differentiation.

401

402 **SARS-CoV-2 infection of iPSC-derived neurons:** SARS-CoV-2 isolate USA-WA1/2020 was  
403 obtained from BEI. Media was removed from cells and replaced with virus-containing media (or  
404 non-virus media for mock-infection wells) at 500 $\mu$ L per well of a 6-well plate or 200 $\mu$ L per  
405 chamberslide well for 1hr adsorption at 37°C, 5% CO<sub>2</sub>, for infection of cells at MOI = 0.1.

406 Culture plates and chamber slides were gently rocked every 15min to ensure even distribution of  
407 infection media. Following 1hr adsorption, non-virus containing media was added to all cells for  
408 final volume of 2mL per well of a 6-well plate or 700 $\mu$ L per chamberslide well and were allowed  
409 to incubate with virus for 24 or 48h and then fixed with 4% PFA for subsequent  
410 immunocytochemical staining. Cells in 6-well plates were allowed to incubate with virus for 24,  
411 48, or 72h; supernatants were then collected, and cells harvested using 700 $\mu$ L of cold TRIzol  
412 Reagent (Ambion, 15596018) for subsequent qPCR analysis.

413

414 **PLX5622 treatment:** Rodent chow (AIN-76A) formulated with CSF1R inhibitor-PLX5622 at a  
415 dose of 1,200 ppm was provided by Plexxikon, Inc (Berkeley, CA). Mice were fed either  
416 PLX5622 chow or control chow 7 days prior to viral infection, and chow was continued until  
417 mice were sacrificed at defined time points post-infection.

418

419 **RNA extraction:** All RNA from VSV experiments with iPSC neurons, astrocytes, and microglia  
420 was extracted via the RNeasy Mini Kit (Qiagen, 74106) using the “Purification of Total RNA  
421 from Animal Cells using Spin Technology” protocol. Homogenization was performed using

422 QIAshredder spin columns (Qiagen, 79656). RNA from SARS-CoV-2 infected neurons was  
423 extracted via the RNeasy Mini Kit using the “Purification of Total RNA, Including Small RNAs,  
424 from Animal Cells” protocol. TRIzol was substituted for QIAzol, and Buffer RW1 was  
425 substituted for Buffer RWT. Homogenization was performed using QIAshredder spin columns.  
426 All RNA from mouse tissues was extracted via the RNeasy Mini Kit using the “Purification of  
427 Total RNA, Including Small RNAs, from Animal Tissues” protocol. TRIzol was substituted for  
428 QIAzol, and Buffer RW1 was substituted for Buffer RWT. Homogenization was performed  
429 using the Bead Ruptor 12 (Omni International) and 1.4 mm ceramic beads (Omni International,  
430 19-627). For brain tissue, the machine was set to 2 cycles at 2.25m/s for 15 seconds with a 1  
431 second pause between cycles. For lungs, the machine was set to 2 cycles at 2.4m/s for 20 seconds  
432 with a 1 second pause between cycles.

433  
434 **cDNA synthesis:** All cDNA was made by following the “First Strand cDNA Synthesis” standard  
435 protocol provided by New England Biolabs with their AMV Reverse Transcriptase (New  
436 England Biolabs, M0277L). Random hexamers (Invitrogen, N8080127) were used for the  
437 reactions. RNase inhibitors were not used in the cDNA synthesis.

438  
439 **Gene expression analysis via quantitative PCR:** All qPCRs were performed using the Bio-Rad  
440 iQ5 and iTaq™ Universal SYBR® Green Supermix (Bio-Rad, 1725120). The standard protocol  
441 by Bio-Rad for iTaq™ Universal SYBR® Green Supermix was used unless otherwise stated.  
442 Reactions were 10µL, and the machine was set to run for 1 cycle (95°C for 3 minutes), followed  
443 by 40 cycles (95°C for 10 seconds, then 55°C for 30 seconds). The following primer sequences  
444 were used:

| <b>Gene Target</b> | <b>Forward Primer</b> | <b>Reverse Primer</b> |
|--------------------|-----------------------|-----------------------|
| Mouse GAPDH        | AACTTTGGCATTGTGGAAGG  | GGATGCAGGGATGATGTTCT  |
| Human GAPDH        | CAGCCTCAAGATCATCAGCA  | TGTGGTCATGAGTCCTTCCA  |
| SARS-CoV-2 Spike   | TAGTGCGTGATCTCCCTCAG  | CCAGCTGTCCAACCTGAAGA  |

445

446 For the brain cytokine and chemokine qPCR, Qiagen's custom qPCR arrays were employed,  
447 following the protocol, "Real-Time PCR for RT<sup>2</sup> Profiler PCR Arrays Formats A, C, D, E, F, G."  
448 The plates were pre-aliquoted with primers for the following murine genes: Glyceraldehyde-3-  
449 phosphate dehydrogenase (GAPDH), beta actin, chemokine ligand 10 (CXCL10), chemokine  
450 ligand 9 (CXCL9), chemokine ligand 2 (CCL2), chemokine ligand 5 (CCL5), interferon gamma  
451 (IFN- $\gamma$ ), interferon beta-1 (IFN-B1), tumor necrosis factor (TNF- $\alpha$ ), interleukin 10 (IL10),  
452 chemokine ligand 1 (CXCL1), interleukin 28B (IFN-L3), chemokine ligand 19 (CCL19).  
453 Reactions were 25 $\mu$ L (1 $\mu$ L cDNA, 11.5  $\mu$ L UltraPure Distilled Water (Invitrogen, 10977-015),  
454 12.5  $\mu$ L iTaq<sup>TM</sup> Universal SYBR<sup>®</sup> Green Supermix). The machine was set to run for 1 cycle  
455 (95°C for 10 minutes), followed by 40 cycles (95°C for 15 seconds, then 60°C for 1 minute).  
456 Ct values for each sample were normalized to an internal control (GAPDH), yielding the dCt  
457 values. dCt values of infected or PLX-treated samples were compared to appropriate control  
458 samples, as indicated, to produce ddCt values. The relative fold change between samples used in  
459 the ddCt calculation was calculated ( $2^{-ddCt}$ ).

460

461 **qPCR statistical analysis:** Statistical analysis was performed in Prism (GraphPad Software).  
462 The Brown-Forsythe and Welch's ANOVA tests were used to compare the means between  
463 groups. Dunnett's test to correct for multiple comparisons was performed when necessary.  
464  
465 **mRNA-Seq:** Total RNA was isolated using the Qiagen RNeasy Kit and QIAshredders for cell  
466 lysis. One microgram of RNA with RNA integrity number values >9 was used for library  
467 preparation using the strand-specific Illumina TruSeq mRNA protocol. Libraries were sequenced  
468 on the NovaSeq 6000 platform using 100 cycles to obtain paired-end 100 reads at >30 million  
469 reads per sample. For RNA-seq analysis, fastq files were trimmed using a base quality score  
470 threshold of >20 and aligned to the hg38 genome with Hisat 2. Reads passing quality control  
471 were used for quantification using featureCounts and analyzed with the R package DESeq2 to  
472 identify DEGs. Genes passing an FDR of 10% were used for GO enrichment analysis using  
473 GOrilla (27) (<http://cbl-gorilla.cs.technion.ac.il/>). For the heatmaps, a list of genes from  
474 GO:0006955 immune response and GO:0006954 inflammatory response was used. From those  
475 lists, the genes with the top 100 most variable TPM were plotted using the R package pheatmap.  
476 For the 48h vs 24h IPA, the TPM of all genes in the 1\_Infected\_24h sample were subtracted  
477 from the TPM of all genes in the 2\_Infected\_48h sample. The list of genes were sorted by the  
478 difference and the top 400 and bottom 400 selected to use as input for IPA's core analysis.  
479  
480 **Histology and immunohistochemical staining:** Mice were euthanized at defined time points  
481 post-infection and tissues harvested according to IACUC-approved guidelines. Tissues were  
482 collected and placed in either cold TRIzol for qPCR analysis or 4% PFA for fixation and  
483 subsequent histological analysis. Following fixation, the 24-48hr brains were either

484 cryoprotected in 30% sucrose, embedded in O.C.T. (Fisher HealthCare), and sliced via Cryostat  
485 in 10µm sagittal sections. Alternatively, tissues were dehydrated and paraffin-embedded and  
486 subsequently use for RNAscope or hematoxylin/eosin (H&E) in combination with luxol fast blue  
487 (LFB) to assess demyelination within the brains of experimental mice. For immunohistochemical  
488 staining of O.C.T.-embedded tissues, slides were rinsed with PBS to remove residual O.C.T., and  
489 antigen retrieval (incubation with 10mM sodium Citrate at 95°C for 15min) was performed if  
490 required for specific antigens at which point samples were incubated with 5% normal goat serum  
491 and 0.1% Triton-X, followed by overnight incubation at 4 °C with primary antibodies. Several  
492 primary antibodies were used, including Iba1 (1:500 Wako), GFAP (1:1000 Abcam), Mac2/  
493 Galactin-3 (1:500, CL8942AP Cedarlane), CD4 (1:200 Abcam), CD8 (1:200 Abcam), MHC I  
494 (1:200 Abcam), and MHC II (1:200 Abcam). On the second day, slides were treated with  
495 appropriate secondary antibodies (1:1000 goat anti-rat/rabbit Invitrogen, 1:1000 goat anti-  
496 chicken, Abcam) following PBS rinsing. Slides were then mounted with DAPI Fluoromount-G  
497 (SouthernBiotech). High-resolution fluorescent images were obtained using a Leica TCS SPE-II  
498 confocal microscope and LAS-X software. For whole brain stitches, automated slide scanning  
499 was performed using a Zeiss AxioScan.Z1 equipped with a Colibri camera and Zen AxioScan  
500 2.3 software. Microglial morphology was determined using the filaments module in Bitplane  
501 Imaris 7.5, as described previously (Elmore, Lee, West, & Green, 2015). Cell quantities were  
502 determined using the spots module in Imaris.

503

504 **RNAscope in situ hybridization of SARS-CoV-2 spike RNA:** RNA in situ hybridization was  
505 performed via RNAscope 2.5 HD Red Assay Kit (Advanced Cell Diagnostics, Cat: 322350) in  
506 accordance with manufacturer's instructions. Fixed tissue sections were treated with the

507 manufacturer's Fresh Frozen Tissue Sample Preparation Protocol, fixed in chilled 4% PFA,  
508 dehydrated, and treated with H<sub>2</sub>O<sub>2</sub> and Protease IV before probe hybridization. Paraffinized  
509 sections were deparaffinized and treated with H<sub>2</sub>O<sub>2</sub> and Protease Plus prior to hybridization.  
510 Probes targeting SARS-CoV-2 spike (Cat: 848561), positive control Hs-PPIB (Cat: 313901), or  
511 negative control DapB (Cat: 310043) were hybridized followed by proprietary assay signal  
512 amplification and detection. Tissues were counterstained with Gill's hematoxylin. An uninfected  
513 mouse was used as a negative control and stained in parallel. Tissues were visualized using an  
514 Olympus BX60 microscope and imaged with a Nikon (Model #) camera.

515

516 **Immunocytochemical staining for SARS-CoV-2:** iPSC-derived neurons on glass-bottomed 4-  
517 well chamberslides were gently washed with 1X PBS and fixed for 1hr with 4%  
518 paraformaldehyde for removal from BSL-3 facility. Wells were subsequently washed 3 times  
519 with 1X PBS, permeabilized for 15min at RT in 0.1% Triton-X in PBS and blocked for 2hrs in a  
520 2% BSA-5% NDS blocking solution. Cells were incubated overnight at 4°C in blocking solution  
521 with primary antibodies anti-MAP2 (EnCor Biotech. Cat:NC0388389) and anti-SARS-CoV-2  
522 nucleocapsid (Sino Bio. Cat: 40143-R019). Cells were then washed with 1X PBS and incubated  
523 in blocking solution for 2hrs at RT with secondary antibodies, Alexa Fluor 594-conjugated goat  
524 anti-chicken and Alexa Fluor 488-conjugated goat anti-rabbit. After staining, cells were imaged  
525 for presence of SARS-CoV-2 nucleocapsid staining and quantified using the Revolve D75.

526

527

528 **Acknowledgements**

529 This work was supported by a COVID CRAFT grant from UC Irvine Office of Research, NIH-  
530 NINDS R35 NS116835, NIH-NINDS NS041249, National Multiple Sclerosis Society grant CA-  
531 1607-25040 and support from the Ray and Tye Noorda Foundation to T.E.L. L.M.T. was  
532 supported by NIH-NINDS R35 NS116872 and K.N.G. was supported by NIH-NINDS  
533 R01NS083801. G.M.O. was supported by Immunology Research Training Grant  
534 5T32AI060573-15 and C.S-G was supported by the Hereditary Disease Foundation. The authors  
535 wish to acknowledge the support of the Chao Family Comprehensive Cancer Center  
536 Experimental Tissue Shared Resource supported by the National Cancer Institute of the National  
537 Institutes of Health under award number P30CA062203.

538

539



## 540 **Figure Legends**

541

542 **Figure 1. SARS-CoV-2 infects human iPSC-derived neurons.** (A) hiPSC-derived neurons  
543 were infected with SARS-CoV-2 at an MOI of 0.1, immunostained with anti-MAP2 and anti-  
544 SARS-CoV-2 N, and imaged at 0, 24, and 48 hours post-infection. (B) Quantification of SARS-  
545 CoV-2 GFP fluorescence of mock-infected and SARS-CoV-2-infected hiPSC-derived neurons.  
546 (C) Perinuclear replication of SARS-CoV-2 in neuronal soma (arrowhead) but no viral axonal  
547 (arrows) transport at 24 hours post-infection. (D) Perinuclear presence of SARS-CoV-2 in soma  
548 (arrowhead) and axon (arrows) at 24 hours post-infection. (E) Heat map of genes expressed 24  
549 and 48h post-infection. (F) Top 12 canonical pathways showing progressive changes from 24 to  
550 48 h post-infection.

551

552 **Figure 2. SARS-CoV-2 infection of lungs of K18-hACE2 mice.** (A) Percent weight change of  
553 K18-hACE2 and WT mice infected with indicated dose of SARS-CoV-2. C57BL/6 wildtype  
554 (WT) mice (n=3) were infected with  $1 \times 10^4$  PFU. K18-hACE2 mice were infected intranasally  
555 with SARS-CoV-2 at either  $1 \times 10^4$  PFU (n=17),  $5 \times 10^4$  PFU (n=4), or  $1 \times 10^5$  PFU (n=8). (B)  
556 Quantitative PCR with primers for Spike mRNA on uninfected and SARS-CoV-2-infected  
557 mouse lung tissue. dCt values are derived from the difference between the Ct values of Spike  
558 mRNA and a housekeeping gene, GAPDH. Lower dCt values indicate increased viral mRNA.  
559 (C) K18-hACE2 mouse lung tissue at day 7 p.i. with  $5 \times 10^4$  PFU SARS-CoV-2 showing  
560 localized Spike mRNA expression as determined by RNAscope. Representative H&E images  
561 from lungs of SARS-CoV-2-infected mice ( $5 \times 10^4$  PFU) showing (D) airway edema, vascular  
562 congestion and intra-alveolar hemorrhage, (E) peri-bronchiolar lymphocytic cuffing, and (F)  
563 Interstitial vascular congestion and lymphocytic infiltrates. (G) Quantitative PCR shows the fold  
564 changes of the indicated genes in two infected mouse lungs compared to uninfected mice.

565

566 **Figure 3. CD8+ T cell infiltration into lungs of SARS-CoV-2-infected mice.** H&E staining of  
567 lungs of SARS-CoV-2 infected mice at day 7 post-infection reveal inflammation (A and C)  
568 associated with CD8+ T cell infiltration (B and D) as determined by immunofluorescent staining.  
569 Lymph node-like structures were also detected containing CD8+ T cells (E and F). Panels A, C,  
570 and E 10X magnification; panels B, D, and F 20X magnification.

571

572 **Figure 4. Widespread neuroinvasion by SARS-CoV-2 of K18 human-ACE2 mice.** (A)  
573 Quantitative PCR with primers for Spike mRNA on uninfected and SARS-CoV-2-infected  
574 mouse brain tissue at day 7 p.i. dCt values are derived from the difference between the Ct values  
575 of Spike mRNA and the housekeeping gene, GAPDH. *In situ* hybridization for Spike viral  
576 mRNA in (B) SARS-CoV-2-infected and (C) sham-infected K18-hACE2 mice. Anatomical  
577 regions in which viral RNA is detected (indicated in red) are indicated: cortex (CTX), striatum  
578 (STR), pallidum (PAL), thalamus (TH), hypothalamus (HY), midbrain (MB), Pons (P), and  
579 medulla (MD), whereas areas that were relatively spared included the olfactory bulb (OB), white  
580 matter (WM) tracts and hippocampus (HC) (D) Representative brain from SARS-CoV-2  
581 infected brain from panel B stained with LFB demonstrates lack of demyelination with (E) high-  
582 power image of myelin tract showing no inflammation or demyelination.

583

584 **Figure 5. Neurons are targets of infection within the brains of SARS-CoV-2 infected K18-  
585 hACE2 mice.** Brains of SARS-CoV-2 infected mice at day 7 p.i. were analyzed to assess cellular

586 targets of infection through *in situ* hybridization using RNAscope *in situ* hybridization using  
587 Spike-specific probes. (A) Cells within the cortex with neuron morphology were primary targets  
588 of infection; (B) high-power image of cells boxed in panel A show viral RNA present within cell  
589 body as well as extending down dendrites extending from the cell body. (C) Viral RNA was also  
590 detected in olfactory bulbs at day 7 p.i. (D) high-power image cells boxed in panel C reveal  
591 neurons in the mitral (open arrow) and glomerular (closed arrow) are infected by virus.  
592 Representative H&E images from the brains of infected K18-hACE2 mice at day 7 p.i. depicting  
593 (E) perivascular cuffing, (F) subventricular inflammation, and (G) leptomeningitis.  
594

595 **Figure 6. SARS-CoV-2 infection of K18 human-ACE2 mice results in microgliosis and**  
596 **myeloid cell infiltration.** Brains from either SARS-CoV-2 or sham-infected mice were removed  
597 at day 7 p.i. to evaluate immune cell infiltration. Microglia activation and monocyte infiltration  
598 were determined in sham-infected mice (A) and SARS-CoV2 infected mice (B) by staining for  
599 expression of Iba1 (red) and Mac2/galectin 3 (green), respectively. Infiltration of peripheral  
600 monocytes into the SARS-CoV-2 infected brain parenchyma occurs via the vasculature (C) as  
601 well as ventricular and leptomeningeal spaces (D) compared to uninfected control mice (E).  
602

603 **Figure 7 Microglia ablation does not impact control of viral replication in the CNS.** (A)  
604 Weight loss of K18-hACE2 mice infected intranasally with  $5 \times 10^4$  PFU of SARS-CoV-2 that  
605 were fed either control chow (n=4) or PLX5622-formulated chow (n=4). (B) Quantitative PCR  
606 in the brains and lungs of infected PLX-treated and non-PLX-treated mice shows no significant  
607 difference in the levels of Spike mRNA in either lung or brain tissue as a result of PLX5622  
608 treatment. (C) Quantification of Iba1-positive cells in the somatosensory cortex shows a  
609 significant (\*\*p<0.01) depletion of microglia from PLX5622 treated mice compared to control  
610 mice. (D) qPCR analysis of brains of experimental mice indicated a reduction in expression of  
611 pro-inflammatory cytokines/chemokines in the brains of PLX5622-treated mice compared to  
612 control mice. (E) Quantification of Mac2-positive cells in the somatosensory cortex an overall  
613 trend in reduced numbers in PLX5622-treated mice compared to controls. Brains from SARS-  
614 CoV-2-infected mice treated with either (F) control chow or (G) PLX5622 were stained with  
615 LFB to assess demyelination or the presence of viral RNA determined by RNAscope.  
616 Representative brain sections are from experimental mice at day 7 p.i.  
617  
618  
619  
620  
621  
622  
623  
624  
625  
626

627  
628  
629  
630  
631  
632  
633  
634  
635  
636  
637  
638  
639  
640  
641  
642  
643  
644  
645  
646  
647  
648  
649  
650  
651  
652  
653  
654  
655  
656  
657  
658  
659  
660  
661  
662  
663  
664  
665  
666  
667  
668  
669  
670  
671  
672

## Literature Cited

1. Channappanavar, R. and S. Perlman, *Age-related susceptibility to coronavirus infections: role of impaired and dysregulated host immunity*. J Clin Invest, 2020. **130**(12): p. 6204-6213.
2. Song, E., et al., *Neuroinvasion of SARS-CoV-2 in human and mouse brain*. J Exp Med, 2021. **218**(3).
3. Lou, J.J., et al., *Neuropathology of COVID-19 (neuro-COVID): clinicopathological update*. Free Neuropathol, 2021. **2**.
4. Virhammar, J., et al., *Acute necrotizing encephalopathy with SARS-CoV-2 RNA confirmed in cerebrospinal fluid*. Neurology, 2020. **95**(10): p. 445-449.
5. Pellegrini, L., et al., *SARS-CoV-2 Infects the Brain Choroid Plexus and Disrupts the Blood-CSF Barrier in Human Brain Organoids*. Cell Stem Cell, 2020. **27**(6): p. 951-961 e5.
6. Munoz-Fontela, C., et al., *Animal models for COVID-19*. Nature, 2020. **586**(7830): p. 509-515.
7. McCray, P.B., Jr., et al., *Lethal infection of K18-hACE2 mice infected with severe acute respiratory syndrome coronavirus*. J Virol, 2007. **81**(2): p. 813-21.
8. Zheng, J., et al., *COVID-19 treatments and pathogenesis including anosmia in K18-hACE2 mice*. Nature, 2021. **589**(7843): p. 603-607.
9. Bao, L., et al., *The pathogenicity of SARS-CoV-2 in hACE2 transgenic mice*. Nature, 2020. **583**(7818): p. 830-833.
10. Sun, S.H., et al., *A Mouse Model of SARS-CoV-2 Infection and Pathogenesis*. Cell Host Microbe, 2020. **28**(1): p. 124-133 e4.
11. Winkler, E.S., et al., *Publisher Correction: SARS-CoV-2 infection of human ACE2-transgenic mice causes severe lung inflammation and impaired function*. Nat Immunol, 2020. **21**(11): p. 1470.
12. Jiang, R.D., et al., *Pathogenesis of SARS-CoV-2 in Transgenic Mice Expressing Human Angiotensin-Converting Enzyme 2*. Cell, 2020. **182**(1): p. 50-58 e8.
13. Reichard, R.R., et al., *Neuropathology of COVID-19: a spectrum of vascular and acute disseminated encephalomyelitis (ADEM)-like pathology*. Acta Neuropathol, 2020. **140**(1): p. 1-6.
14. Elmore, M.R., et al., *Colony-stimulating factor 1 receptor signaling is necessary for microglia viability, unmasking a microglia progenitor cell in the adult brain*. Neuron, 2014. **82**(2): p. 380-97.
15. Spangenberg, E., et al., *Sustained microglial depletion with CSF1R inhibitor impairs parenchymal plaque development in an Alzheimer's disease model*. Nat Commun, 2019. **10**(1): p. 3758.
16. Trujillo, J.A., E.L. Fleming, and S. Perlman, *Transgenic CCL2 expression in the central nervous system results in a dysregulated immune response and enhanced lethality after coronavirus infection*. J Virol, 2013. **87**(5): p. 2376-89.
17. Kim, T.S. and S. Perlman, *Viral expression of CCL2 is sufficient to induce demyelination in RAG1<sup>-/-</sup> mice infected with a neurotropic coronavirus*. J Virol, 2005. **79**(11): p. 7113-7120.

- 673 18. Held, K.S., et al., *Differential roles of CCL2 and CCR2 in host defense to coronavirus*  
674 *infection*. *Virology*, 2004. **329**(2): p. 251-60.
- 675 19. Chen, B.P., W.A. Kuziel, and T.E. Lane, *Lack of CCR2 results in increased mortality and*  
676 *impaired leukocyte activation and trafficking following infection of the central nervous*  
677 *system with a neurotropic coronavirus*. *J Immunol*, 2001. **167**(8): p. 4585-92.
- 678 20. Glass, W.G., et al., *Antibody Targeting of the CC Chemokine Ligand 5 Results in*  
679 *Diminished Leukocyte Infiltration into the Central Nervous System and Reduced*  
680 *Neurologic Disease in a Viral Model of Multiple Sclerosis*. *The Journal of Immunology*,  
681 2004. **172**(7): p. 4018-4025.
- 682 21. Glass, W.G., et al., *Reduced macrophage infiltration and demyelination in mice lacking*  
683 *the chemokine receptor CCR5 following infection with a neurotropic coronavirus*.  
684 *Virology*, 2001. **288**(1): p. 8-17.
- 685 22. Liu, M.T., et al., *Cutting Edge: The T Cell Chemoattractant IFN-Inducible Protein 10 Is*  
686 *Essential in Host Defense Against Viral-Induced Neurologic Disease*. *The Journal of*  
687 *Immunology*, 2000. **165**(5): p. 2327-2330.
- 688 23. Stiles, L.N., et al., *T cell antiviral effector function is not dependent on CXCL10*  
689 *following murine coronavirus infection*. *J Immunol*, 2006. **177**(12): p. 8372-80.
- 690 24. Stiles, L.N., et al., *CXCL10 and trafficking of virus-specific T cells during coronavirus*  
691 *demyelination*. *Autoimmunity*, 2009. **In Press**.
- 692 25. Hosking, M.P., et al., *A protective role for ELR+ chemokines during acute viral*  
693 *encephalomyelitis*. *PLoS Pathog*, 2009. **5**(11): p. e1000648.
- 694 26. Lowery, S.A., A. Sariol, and S. Perlman, *Innate immune and inflammatory responses to*  
695 *SARS-CoV-2: Implications for COVID-19*. *Cell Host Microbe*, 2021. **29**(7): p. 1052-  
696 1062.
- 697 27. Channappanavar, R. and S. Perlman, *Pathogenic human coronavirus infections: causes*  
698 *and consequences of cytokine storm and immunopathology*. *Semin Immunopathol*, 2017.  
699 **39**(5): p. 529-539.
- 700 28. Alosaimi, B., et al., *Complement Anaphylatoxins and Inflammatory Cytokines as*  
701 *Prognostic Markers for COVID-19 Severity and In-Hospital Mortality*. *Front Immunol*,  
702 2021. **12**: p. 668725.
- 703 29. Huang, C., et al., *Clinical features of patients infected with 2019 novel coronavirus in*  
704 *Wuhan, China*. *Lancet*, 2020. **395**(10223): p. 497-506.
- 705 30. Laudanski, K., et al., *Unbiased Analysis of Temporal Changes in Immune Serum Markers*  
706 *in Acute COVID-19 Infection With Emphasis on Organ Failure, Anti-Viral Treatment,*  
707 *and Demographic Characteristics*. *Front Immunol*, 2021. **12**: p. 650465.
- 708 31. Lev, S., et al., *Observational cohort study of IP-10's potential as a biomarker to aid in*  
709 *inflammation regulation within a clinical decision support protocol for patients with*  
710 *severe COVID-19*. *PLoS One*, 2021. **16**(1): p. e0245296.
- 711 32. Kumari, P., et al., *Neuroinvasion and Encephalitis Following Intranasal Inoculation of*  
712 *SARS-CoV-2 in K18-hACE2 Mice*. *Viruses*, 2021. **13**(1).
- 713 33. Carossino, M., et al., *Fatal neuroinvasion of SARS-CoV-2 in K18-hACE2 mice is*  
714 *partially dependent on hACE2 expression*. *bioRxiv*, 2021.
- 715 34. Schmitt, E., M. Naveau, and Y. Mechulam, *Eukaryotic and archaeal translation*  
716 *initiation factor 2: a heterotrimeric tRNA carrier*. *FEBS Lett*, 2010. **584**(2): p. 405-12.

- 717 35. Showkat, M., M.A. Beigh, and K.I. Andrabi, *mTOR Signaling in Protein Translation*  
718 *Regulation: Implications in Cancer Genesis and Therapeutic Interventions*. Mol Biol Int,  
719 2014. **2014**: p. 686984.
- 720 36. Lane, T.E., et al., *Dynamic regulation of alpha- and beta-chemokine expression in the*  
721 *central nervous system during mouse hepatitis virus-induced demyelinating disease*. J  
722 Immunol, 1998. **160**(2): p. 970-8.
- 723 37. Syage, A.R., et al., *Single-Cell RNA Sequencing Reveals the Diversity of the*  
724 *Immunological Landscape following Central Nervous System Infection by a Murine*  
725 *Coronavirus*. J Virol, 2020. **94**(24).
- 726 38. Wheeler, D.L., et al., *Microglia are required for protection against lethal coronavirus*  
727 *encephalitis in mice*. J Clin Invest, 2018. **128**(3): p. 931-943.
- 728 39. Funk, K.E. and R.S. Klein, *CSF1R antagonism limits local restimulation of antiviral*  
729 *CD8(+) T cells during viral encephalitis*. J Neuroinflammation, 2019. **16**(1): p. 22.
- 730 40. Sanchez, J.M.S., et al., *Microglial cell depletion is fatal with low level picornavirus*  
731 *infection of the central nervous system*. J Neurovirol, 2019. **25**(3): p. 415-421.
- 732 41. Seitz, S., P. Clarke, and K.L. Tyler, *Pharmacologic Depletion of Microglia Increases*  
733 *Viral Load in the Brain and Enhances Mortality in Murine Models of Flavivirus-Induced*  
734 *Encephalitis*. J Virol, 2018. **92**(16).
- 735 42. Wlatl, I., et al., *Microglia have a protective role in viral encephalitis-induced seizure*  
736 *development and hippocampal damage*. Brain Behav Immun, 2018. **74**: p. 186-204.
- 737 43. Mangale, V., et al., *Microglia influence host defense, disease, and repair following*  
738 *murine coronavirus infection of the central nervous system*. Glia, 2020. **68**(11): p. 2345-  
739 2360.
- 740 44. Sariol, A., et al., *Microglia depletion exacerbates demyelination and impairs*  
741 *remyelination in a neurotropic coronavirus infection*. Proc Natl Acad Sci U S A, 2020.  
742 **117**(39): p. 24464-24474.
- 743 45. Glatzel, M., et al., *Neuropathology associated with SARS-CoV-2 infection*. Lancet, 2021.  
744 **397**(10271): p. 276.
- 745 46. Leven, Y. and J. Bosel, *Neurological manifestations of COVID-19 - an approach to*  
746 *categories of pathology*. Neurol Res Pract, 2021. **3**(1): p. 39.
- 747 47. Johansson, A., et al., *Neurological manifestations of COVID-19: A comprehensive*  
748 *literature review and discussion of mechanisms*. J Neuroimmunol, 2021. **358**: p. 577658.
- 749 48. Matschke, J., et al., *Neuropathology of patients with COVID-19 in Germany: a post-*  
750 *mortem case series*. Lancet Neurol, 2020. **19**(11): p. 919-929.
- 751 49. Song, E., et al., *Divergent and self-reactive immune responses in the CNS of COVID-19*  
752 *patients with neurological symptoms*. Cell Rep Med, 2021. **2**(5): p. 100288.
- 753 50. Yang, A.C., et al., *Dysregulation of brain and choroid plexus cell types in severe*  
754 *COVID-19*. Nature, 2021. **595**(7868): p. 565-571.
- 755 51. Karuppan, M.K.M., et al., *SARS-CoV-2 Infection in the Central and Peripheral Nervous*  
756 *System-Associated Morbidities and Their Potential Mechanism*. Mol Neurobiol, 2021.  
757 **58**(6): p. 2465-2480.
- 758 52. Akhter, N., et al., *Impact of COVID-19 on the cerebrovascular system and the prevention*  
759 *of RBC lysis*. Eur Rev Med Pharmacol Sci, 2020. **24**(19): p. 10267-10278.
- 760 53. Chia, K.X., S. Polakhare, and S.D. Bruno, *Possible affective cognitive cerebellar*  
761 *syndrome in a young patient with COVID-19 CNS vasculopathy and stroke*. BMJ Case  
762 Rep, 2020. **13**(10).

- 763 54. MacLean, M.A., et al., *The potential role of microvascular pathology in the neurological*  
764 *manifestations of coronavirus infection*. *Fluids Barriers CNS*, 2020. **17**(1): p. 55.
- 765 55. Thakur, K.T., et al., *COVID-19 neuropathology at Columbia University Irving Medical*  
766 *Center/New York Presbyterian Hospital*. *Brain*, 2021. **144**(9): p. 2696-2708.
- 767 56. Al-Dalahmah, O., et al., *Neuronophagia and microglial nodules in a SARS-CoV-2 patient*  
768 *with cerebellar hemorrhage*. *Acta Neuropathol Commun*, 2020. **8**(1): p. 147.
- 769 57. Schwabenland, M., et al., *Deep spatial profiling of human COVID-19 brains reveals*  
770 *neuroinflammation with distinct microanatomical microglia-T-cell interactions*.  
771 *Immunity*, 2021. **54**(7): p. 1594-1610 e11.
- 772 58. Consortium, H.D.i., *Induced pluripotent stem cells from patients with Huntington's*  
773 *disease show CAG-repeat-expansion-associated phenotypes*. *Cell Stem Cell*, 2012. **11**(2):  
774 p. 264-78.
- 775 59. Smith-Geater, C., et al., *Aberrant Development Corrected in Adult-Onset Huntington's*  
776 *Disease iPSC-Derived Neuronal Cultures via WNT Signaling Modulation*. *Stem Cell*  
777 *Reports*, 2020. **14**(3): p. 406-419.
- 778  
779  
780  
781  
782  
783  
784

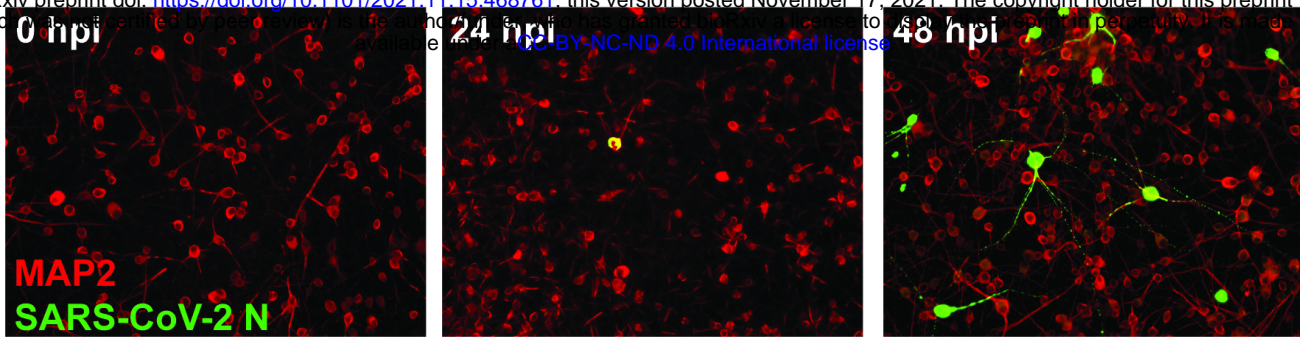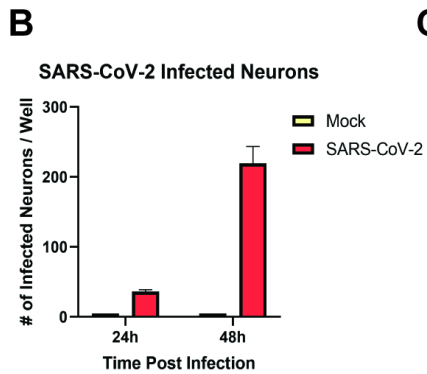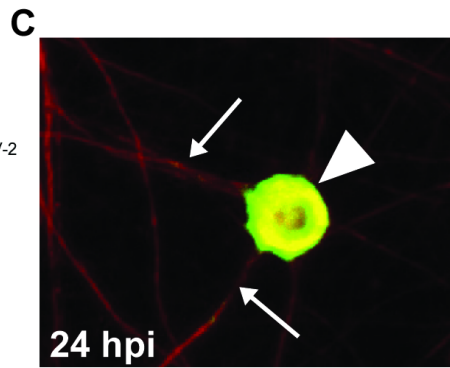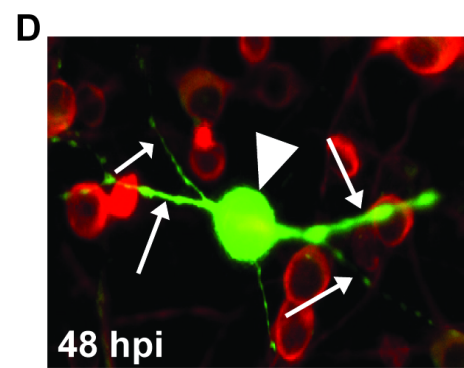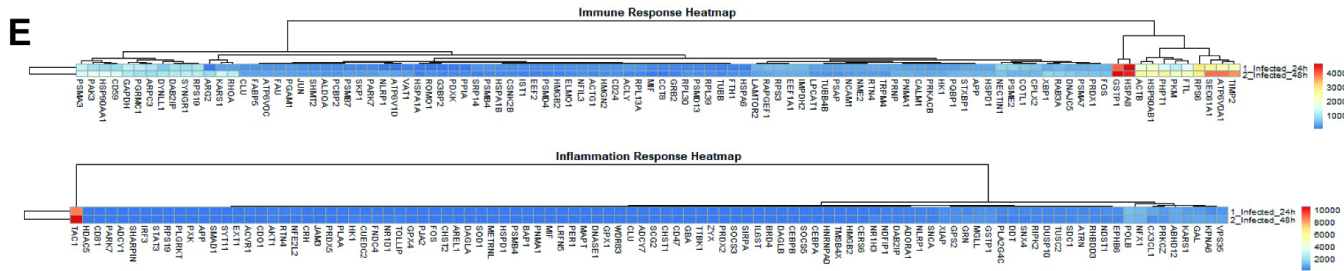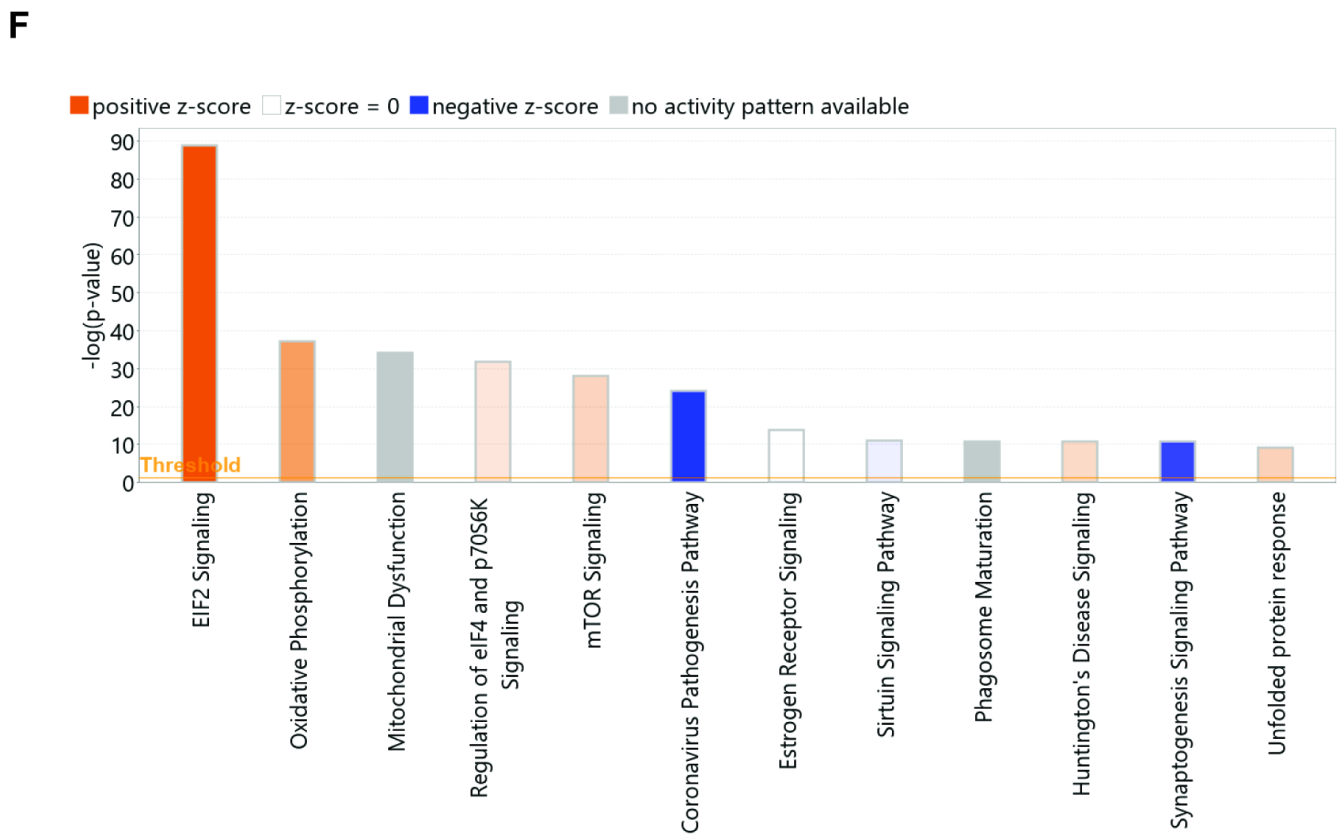

**A**

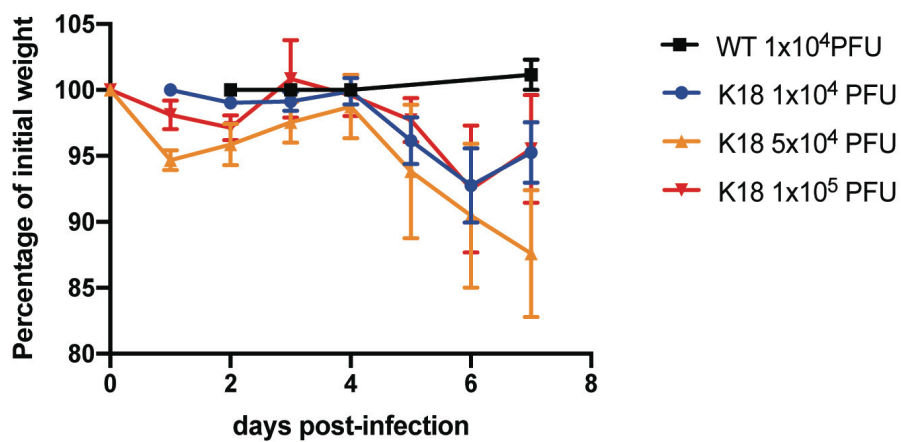

**B**

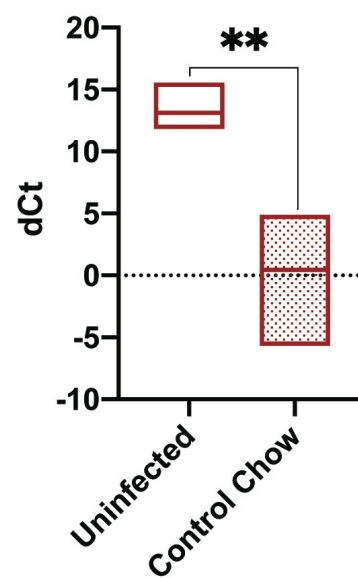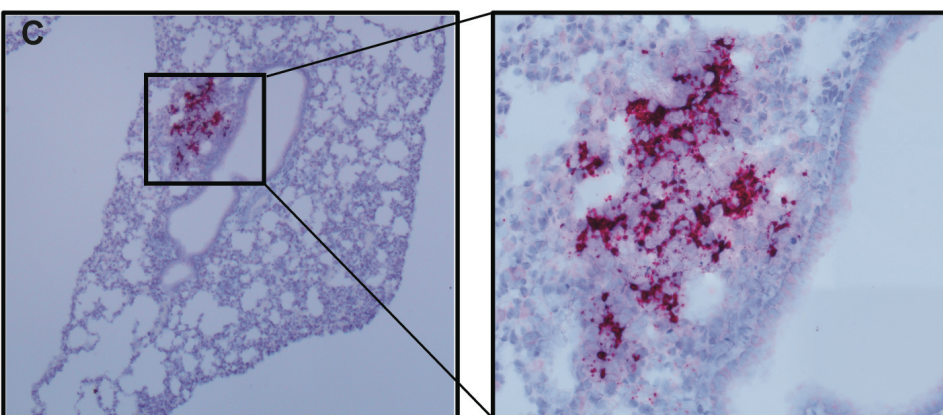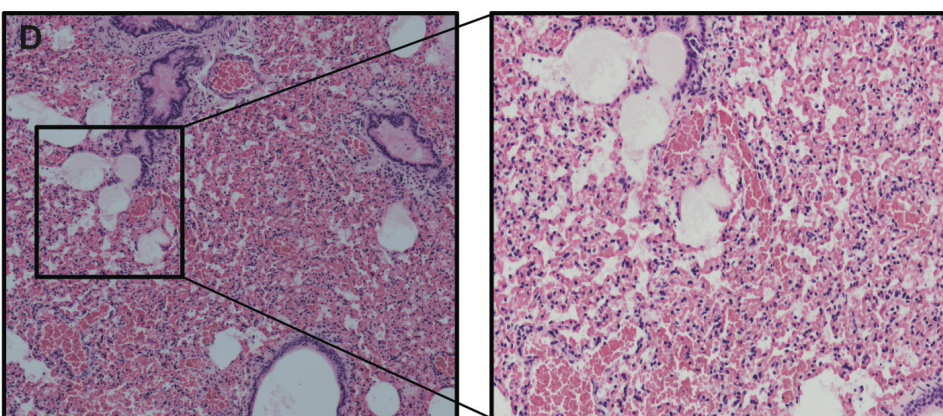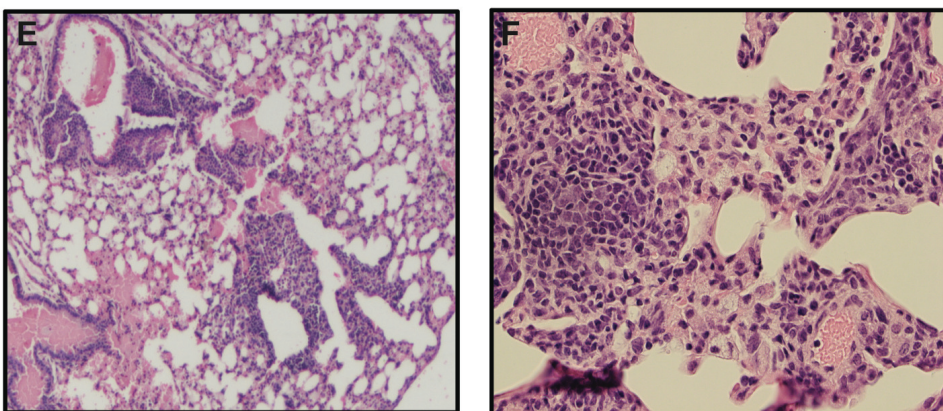

**G**

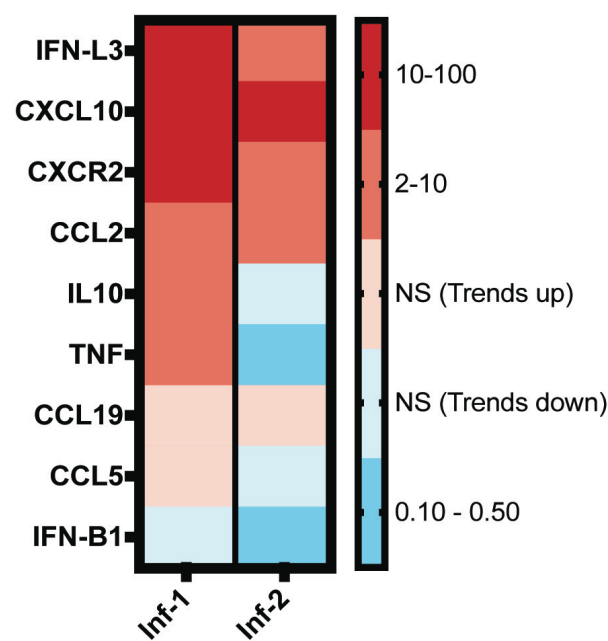



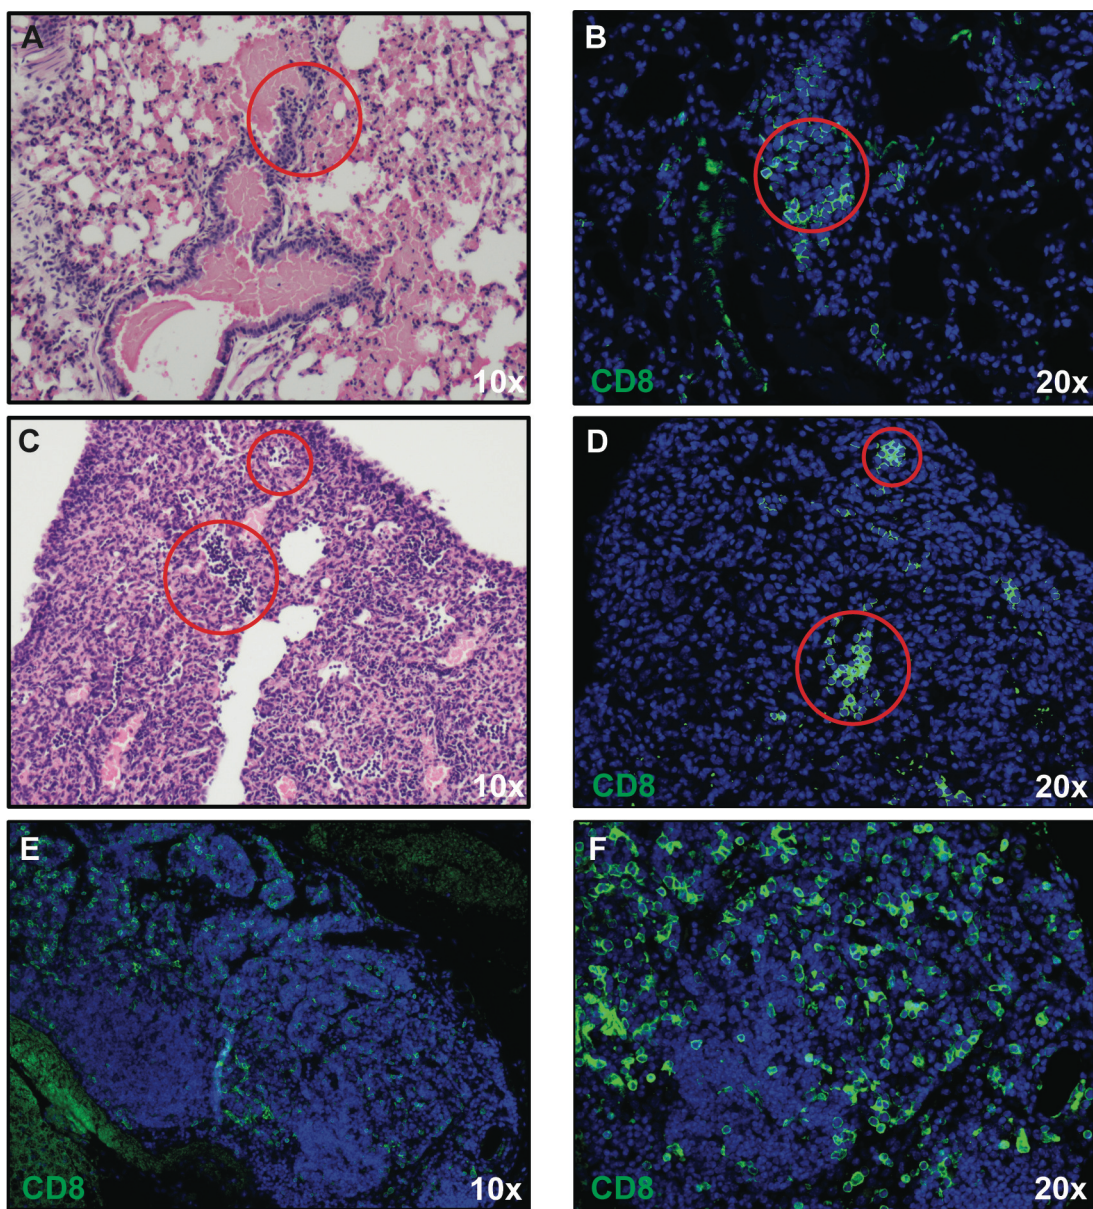

A

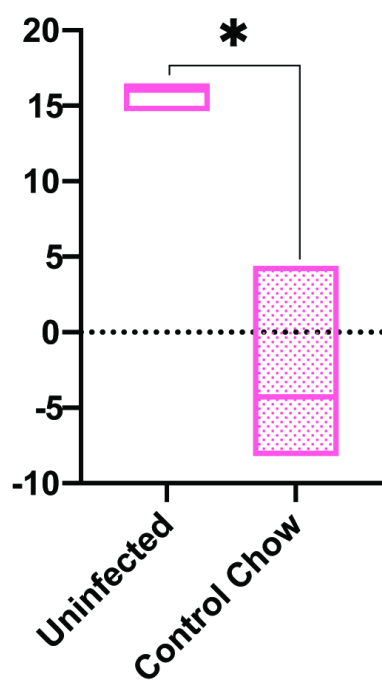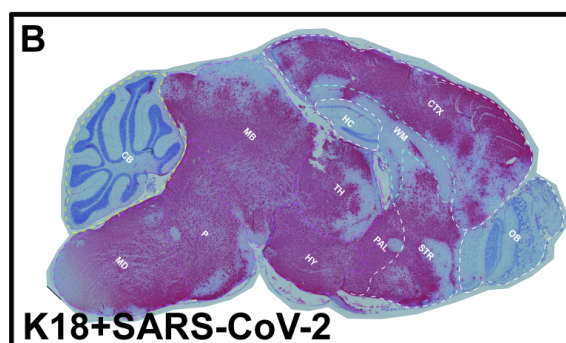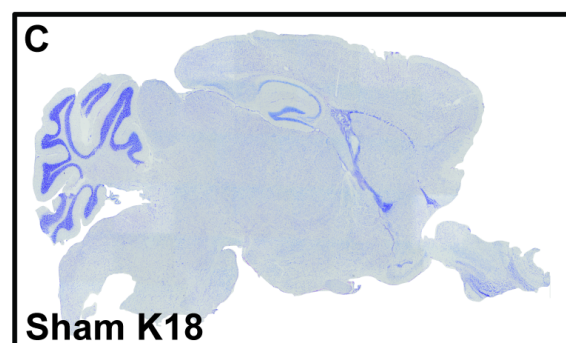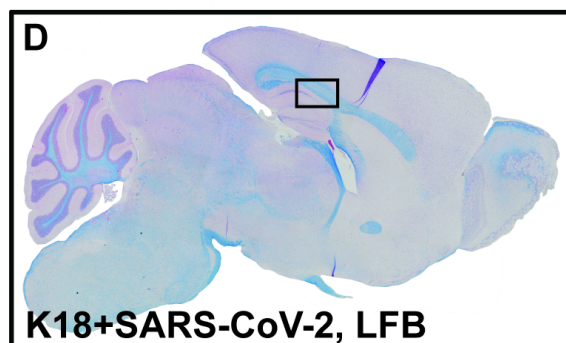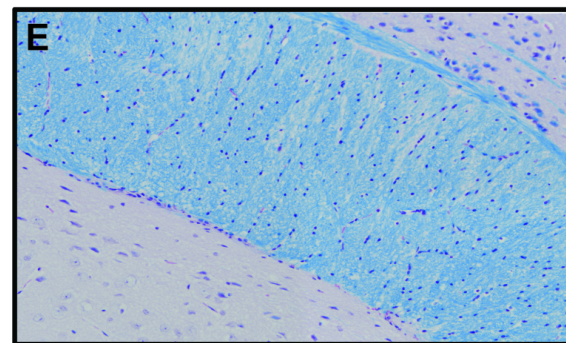

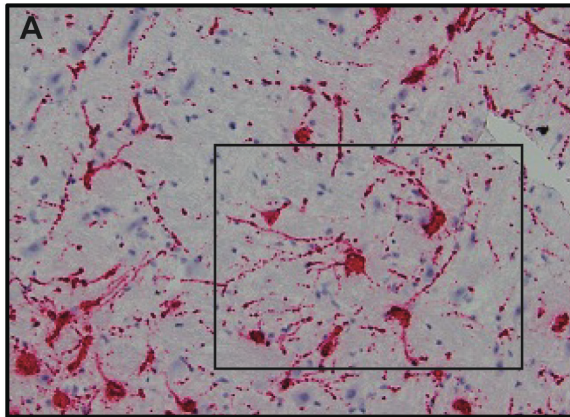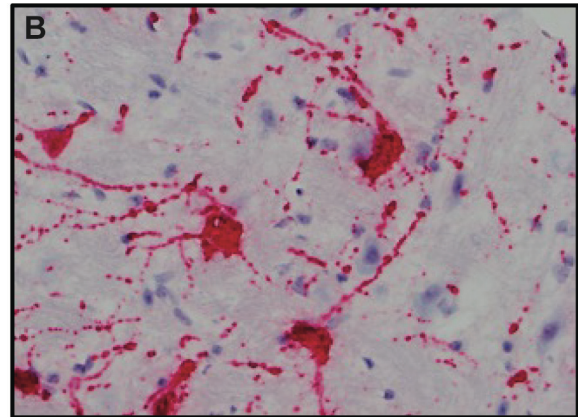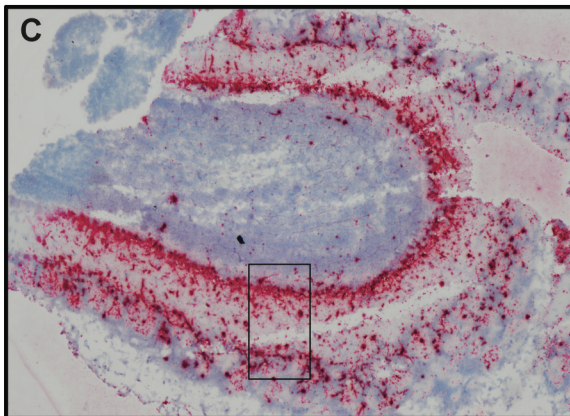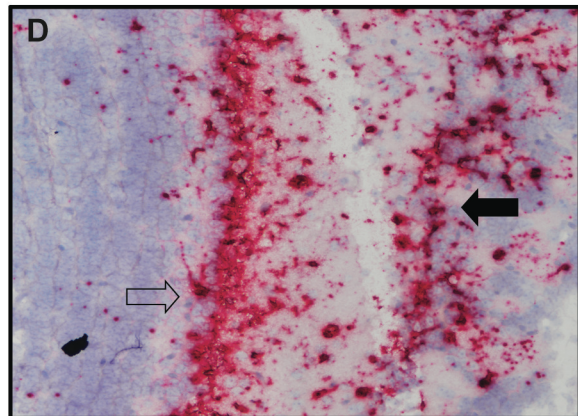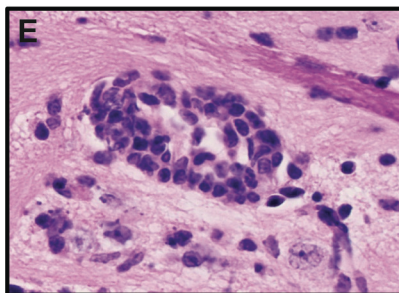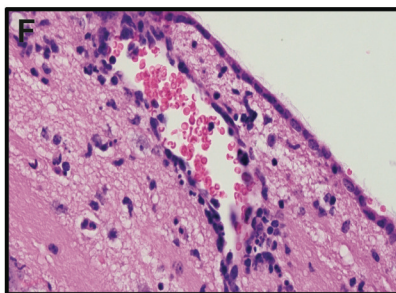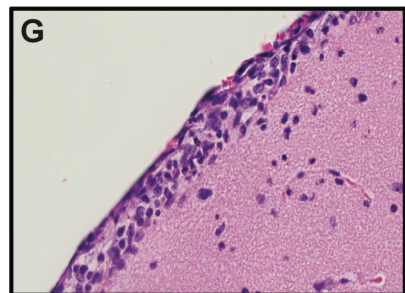

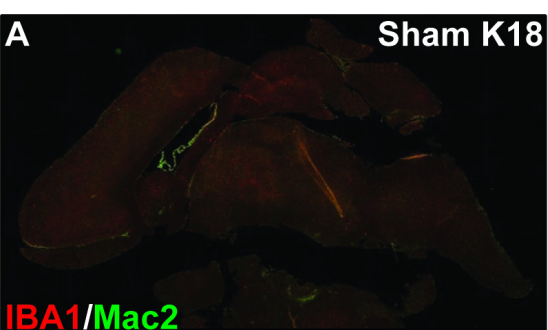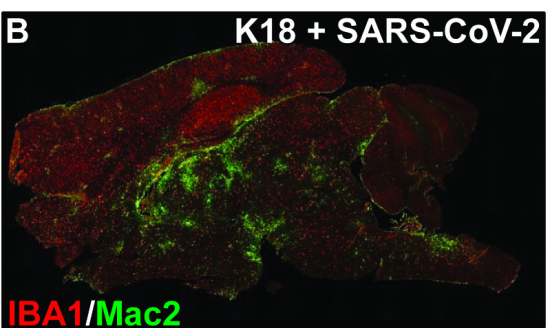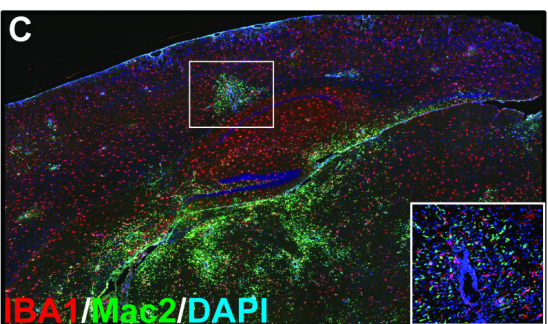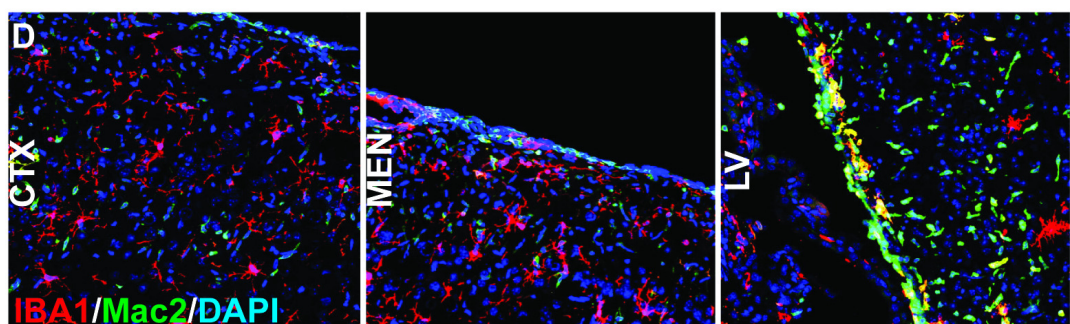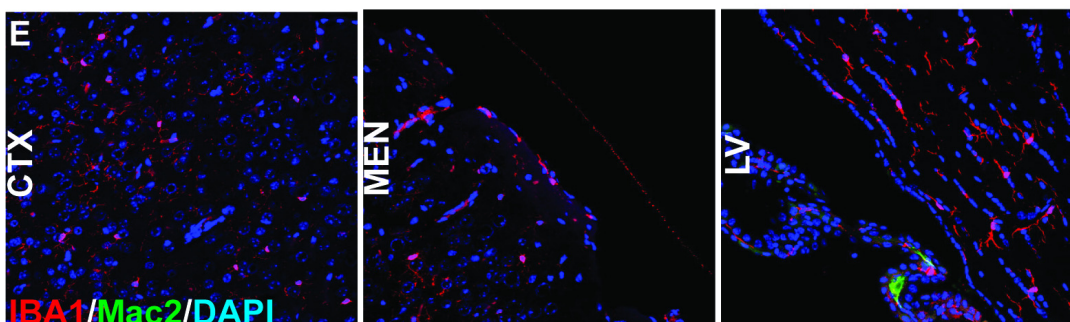

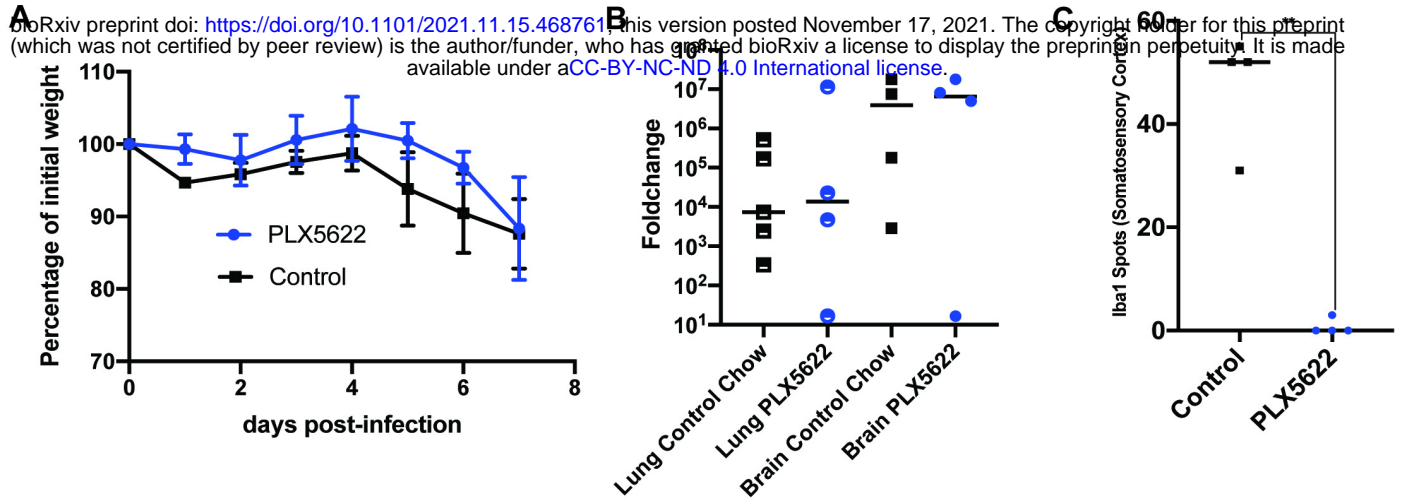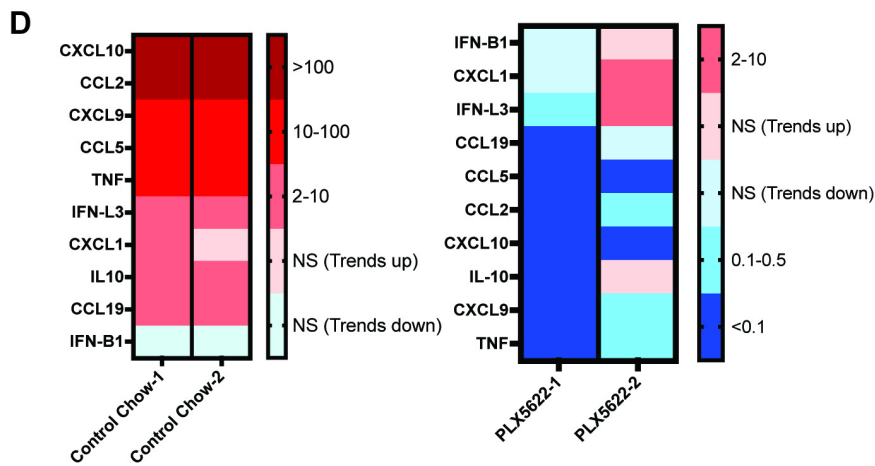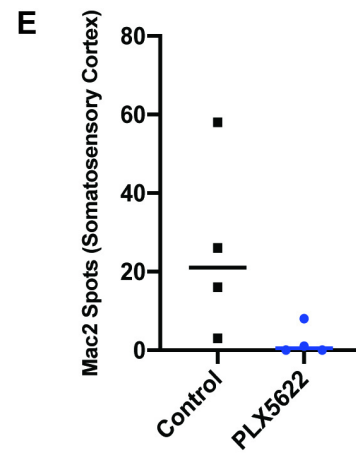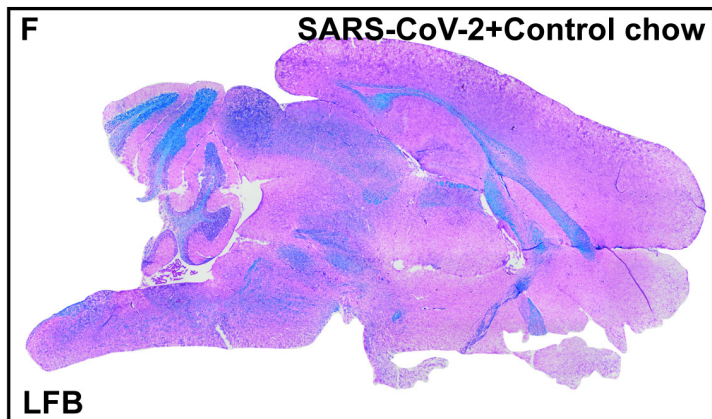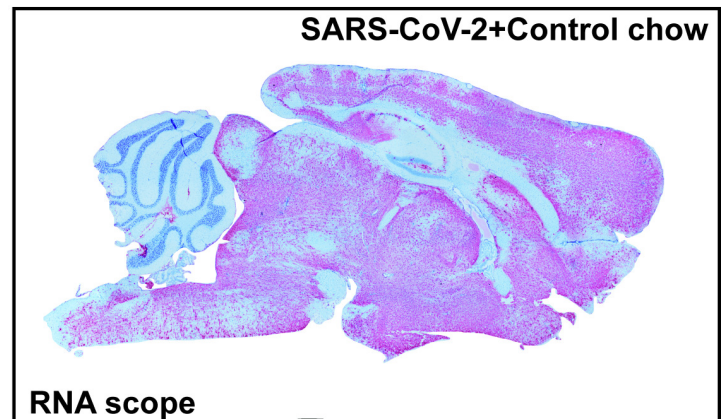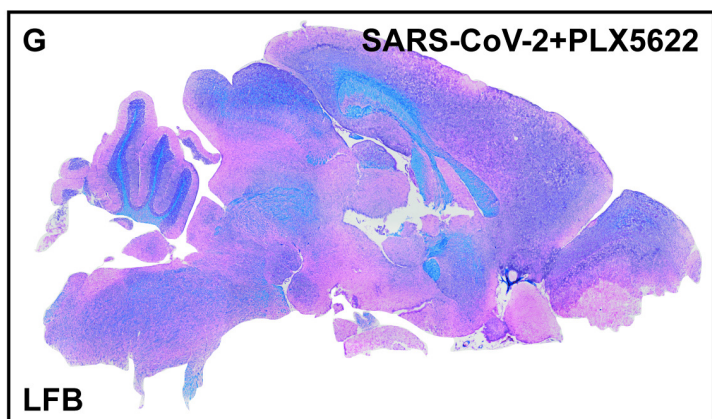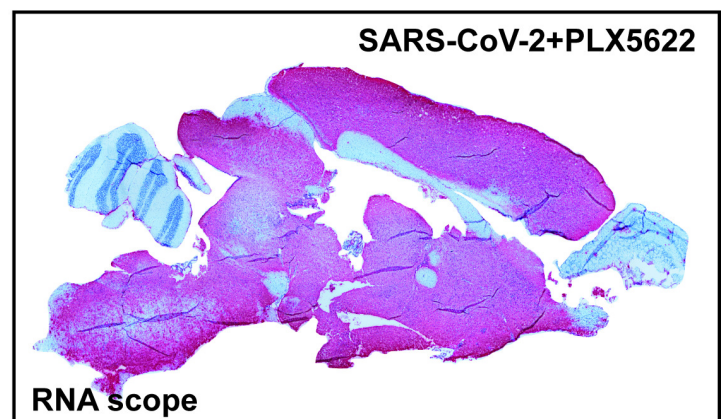

Source: https://www.biorxiv.org/content/biorxiv/early/2021/11/17/2021.11.15.468761.full.pdf
